# Supplementary material for: Construction of Fe3O4@Au catalysts via the surface functional group effect of ferric oxide for efficient electrocatalytic nitrite reduction
Source: Royal Society of Chemistry journal article supplement (doi:10.1039/d4dt01956c), 2024-01-01
Supplement: d4dt01956c1.pdf [file d4dt01956c1.pdf]

## Supplementary Information

### **Construction of Fe<sub>3</sub>O<sub>4</sub>@Au catalysts via the surface functional group effect of ferric oxide for efficient electrocatalytic nitrite reduction**

Wei Zhang<sup>a</sup>, Jin Li<sup>a</sup>, Cuilian Sun<sup>a</sup>, Xiujing Xing<sup>b</sup>, Yaokang Lv<sup>c</sup>, Wei Xiong<sup>a,\*</sup>, and Hao Li<sup>d,\*</sup>

<sup>a</sup> Key Laboratory of Novel Biomass-Based Environmental and Energy Materials in Petroleum and Chemical Industry, Key Laboratory of Green Chemical Engineering Process of Ministry of Education, Hubei Key Laboratory of Novel Reactor & Green Chemical Technology, School of Chemistry and Environmental Engineering, Wuhan Institute of Technology, Wuhan 430205, China

<sup>b</sup> Chemistry Department, University of California, Davis, California 95616, United States

<sup>c</sup> College of Chemical Engineering, Zhejiang University of Technology, Hangzhou, 310014 P. R. China

<sup>d</sup> Advanced Institute for Materials Research (WPI-AIMR), Tohoku University, Sendai 980-8577, Japan

---

\*Corresponding author

E-mail address: xiongwei@wit.edu.cn (W. X.); li.hao.b8@tohoku.ac.jp (H. L.)

Tel/Fax: +86-27-87195001; +81-080-9363-8256

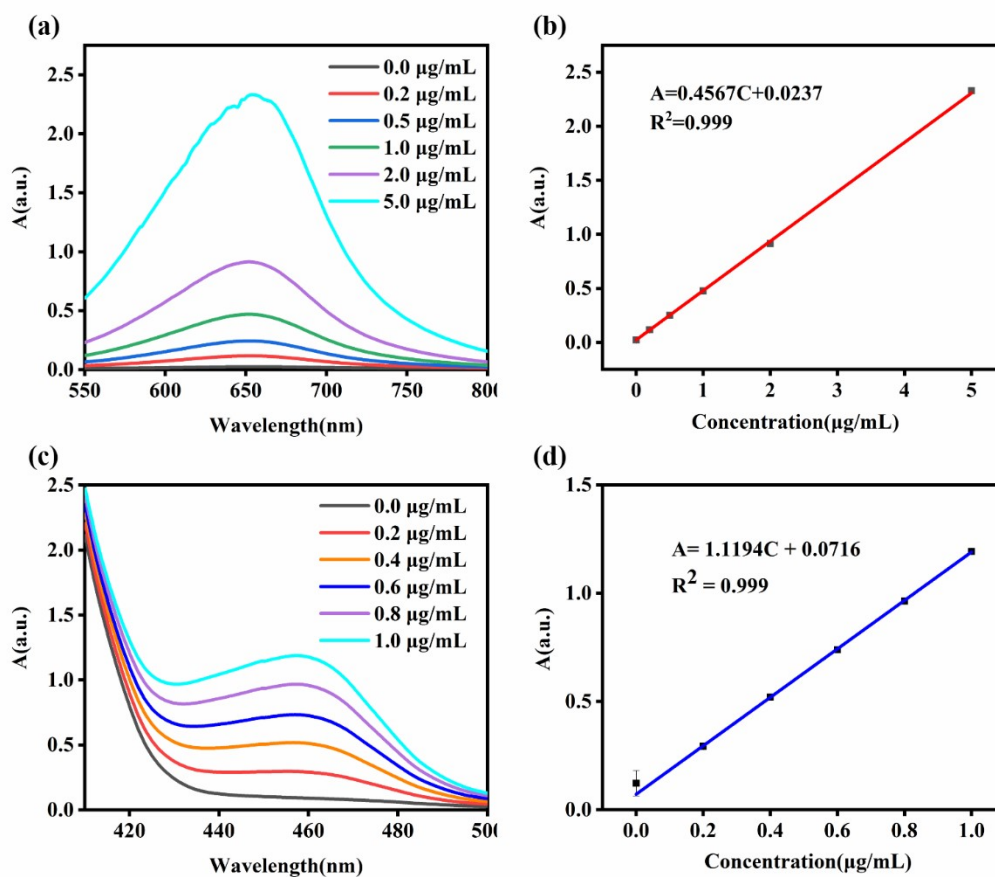

Figure S1 (a) UV absorption spectra at different  $\text{NH}_3$  concentrations and (b) Ammonia nitrogen standard curve; (c) UV-Vis absorption spectra of different concentrations of  $\text{N}_2\text{H}_4$  and (d) Standard curve of  $\text{N}_2\text{H}_4$ .

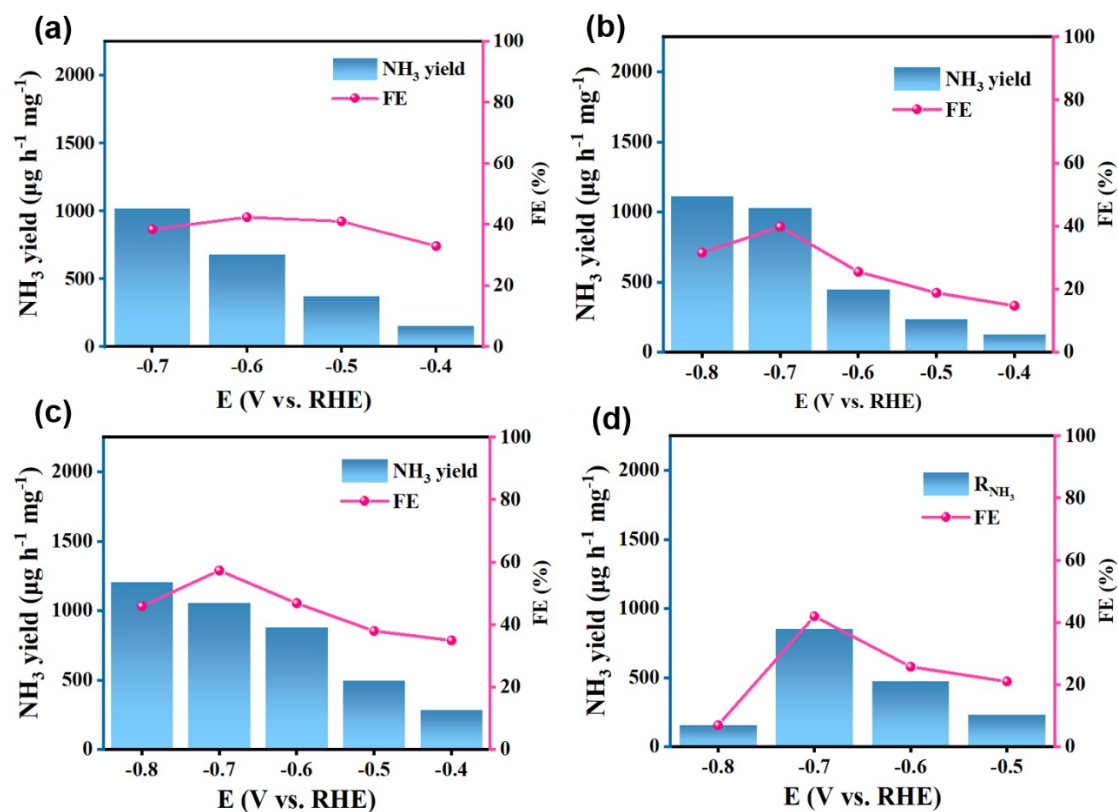

Figure S2  $\text{NH}_3$  yield and FE of (a)  $\text{Fe}_3\text{O}_4$ , (b)  $\text{Fe}_3\text{O}_4\text{-NH}_2$ , (c)  $\text{Fe}_3\text{O}_4\text{-COOH}$  and (d)  $\text{Fe}_3\text{O}_4\text{-SH}$  at various voltages.

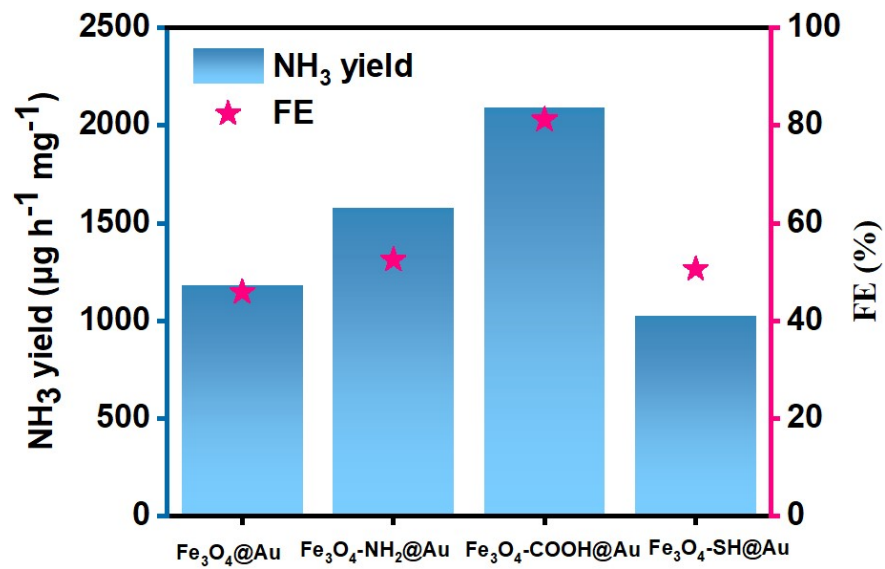

Figure S3 Performance comparison of different samples.

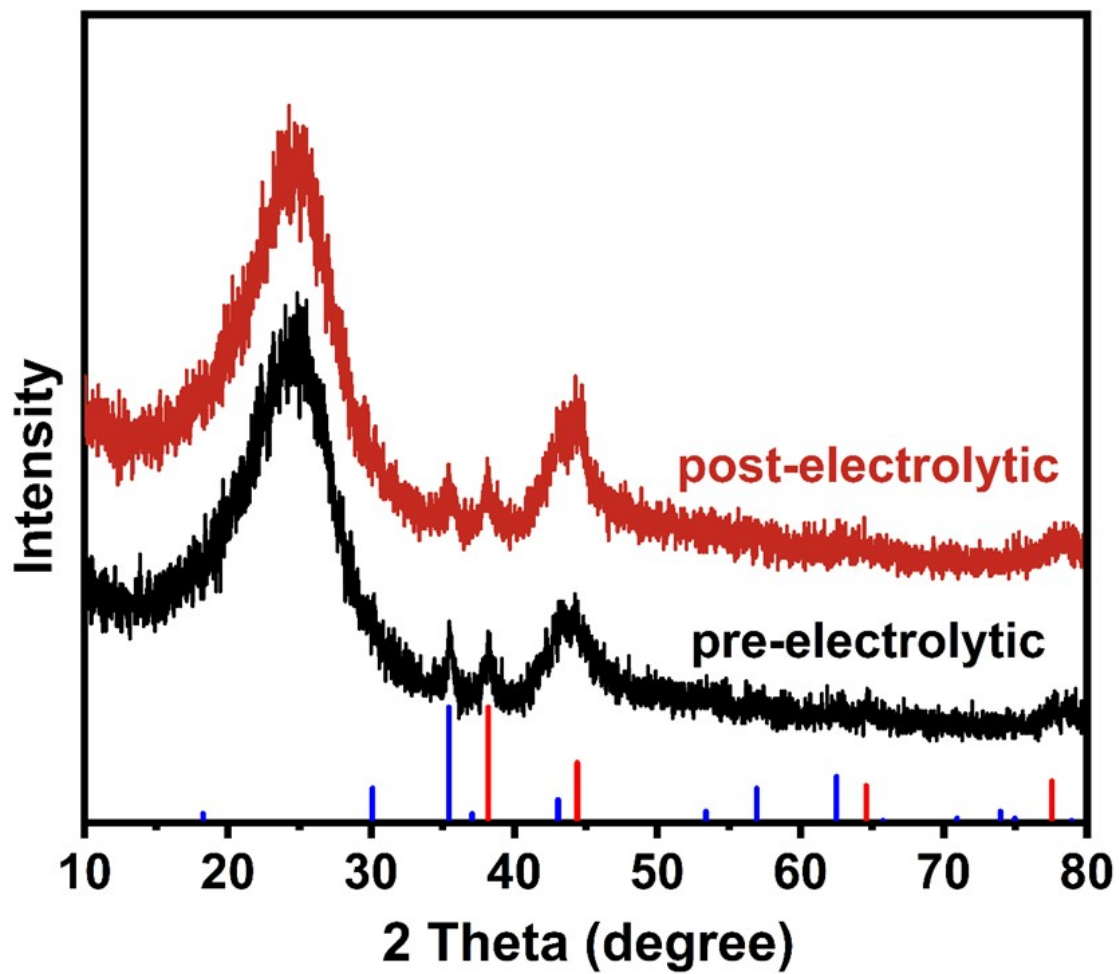

Figure S4 XRD of  $\text{Fe}_3\text{O}_4\text{-COOH@Au}_{1.5}/\text{CC}$ , both unelectrolysed (black) and subjected to electrolysis for 24 h (red).

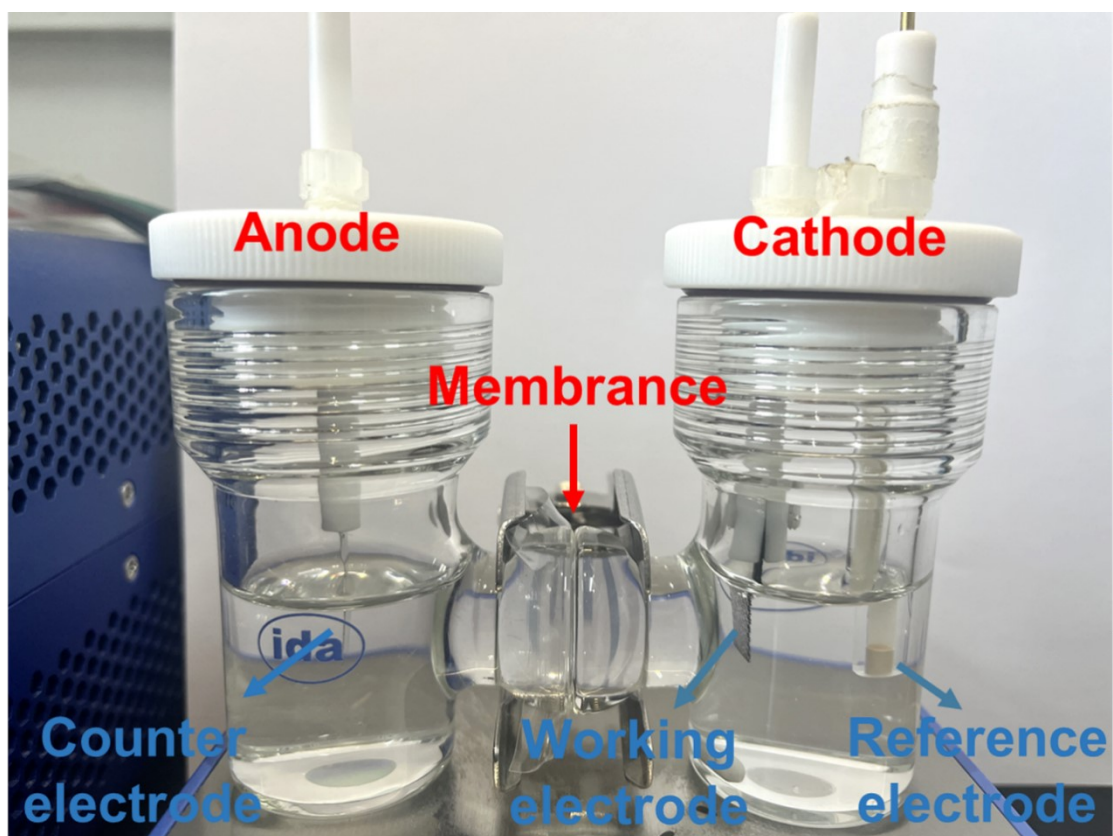

Figure S5 H-Type Electrolysis Cell.

Table S1 ICP test results for  $\text{Fe}_3\text{O}_4\text{-COOH@Au}_{0.5}$ ,  $\text{Fe}_3\text{O}_4\text{-COOH@Au}_{1.0}$  和  $\text{Fe}_3\text{O}_4\text{-COOH@Au}_{1.5}$ .

| Sample                                       | Test Elements | Relative element content (%) |
|----------------------------------------------|---------------|------------------------------|
| $\text{Fe}_3\text{O}_4\text{-COOH@Au}_{0.5}$ | Au            | 1.38%                        |
| $\text{Fe}_3\text{O}_4\text{-COOH@Au}_{1.0}$ | Au            | 16.27%                       |
| $\text{Fe}_3\text{O}_4\text{-COOH@Au}_{1.5}$ | Au            | 45.53%                       |

Table S2 Performance comparison of samples Fe<sub>3</sub>O<sub>4</sub>, Fe<sub>3</sub>O<sub>4</sub>-NH<sub>2</sub>, Fe<sub>3</sub>O<sub>4</sub>-COOH and Fe<sub>3</sub>O<sub>4</sub>-SH.

| sample                                          | NH <sub>3</sub> yield (μg h <sup>-1</sup> mg <sub>cat</sub> <sup>-1</sup> ) | FE (%) |
|-------------------------------------------------|-----------------------------------------------------------------------------|--------|
| Fe <sub>3</sub> O <sub>4</sub>                  | 682.7                                                                       | 42.0   |
| Fe <sub>3</sub> O <sub>4</sub> -NH <sub>2</sub> | 1026.5                                                                      | 39.8   |
| Fe <sub>3</sub> O <sub>4</sub> -COOH            | 1053.9                                                                      | 57.0   |
| Fe <sub>3</sub> O <sub>4</sub> -SH              | 851.3                                                                       | 41.2   |
